# Supplementary material for: A small-molecule compound D6 overcomes EGFR-T790M-mediated resistance in non-small cell lung cancer
Source: PubMed Central journal article supplement (PMC8668973; doi:10.1038/s42003-021-02906-4), 2021-12-13
Supplement: 42003_2021_2906_MOESM2_ESM.pdf [file 42003_2021_2906_MOESM2_ESM.pdf]

## Description of Additional Supplementary Files

**File name:** Supplementary Data 1

**Description:** Source data for all graphs and charts.
